# Supplementary material for: Occurrence and Distribution of Persistent Organic Pollutants (POPs) from Sele River, Southern Italy: Analysis of Polychlorinated Biphenyls and Organochlorine Pesticides in a Water–Sediment System
Source: MDPI journal article supplement (doi:10.3390/toxics10110662), 2022-11-04
Supplement: s1 [file s1]

# Supplementary Materials: Occurrence and distribution of persistent organic pollutants (POPs) from Sele River southern Italy: Analysis of polychlorinated biphenyls and organochlorine pesticides in a water-sediment system

Elvira De Rosa. Paolo Montuori. Maria Triassi. Armando Masucci and Antonio Nardone

**Table S1.** Percentage of PCBs in the different seasons in the water samples (DP) from Sele River (Southern Italy).

| Season | Matrix | Site           | DI+TRI | TETRA | % PCBs |      |      |
|--------|--------|----------------|--------|-------|--------|------|------|
|        |        |                |        |       | PENTA  | ESA  | EPTA |
| NOV    | DP     | River Mouth    | 7.3    | 31.7  | 23.0   | 24.2 | 13.7 |
| NOV    | DP     | Nord 500mt     | 7.7    | 31.7  | 18.8   | 33.4 | 8.4  |
| NOV    | DP     | Nord 1000mt    | 7.6    | 42.9  | 23.2   | 22.4 | 3.9  |
| NOV    | DP     | Nord 1500mt    | 6.7    | 38.5  | 18.6   | 26.8 | 9.3  |
| NOV    | DP     | Central 500mt  | 7.6    | 42.6  | 21.2   | 23.6 | 5.0  |
| NOV    | DP     | Central 1000mt | 6.9    | 38.2  | 25.1   | 24.4 | 5.5  |
| NOV    | DP     | Central 1500mt | 6.8    | 35.7  | 21.8   | 26.5 | 9.2  |
| NOV    | DP     | South 500mt    | 7.9    | 36.1  | 29.2   | 26.6 | 0.3  |
| NOV    | DP     | South 1000mt   | 7.6    | 34.9  | 26.9   | 21.9 | 8.8  |
| NOV    | DP     | South 1500mt   | 8.5    | 38.9  | 26.5   | 24.2 | 2.0  |
| FEB    | DP     | River Mouth    | 6.4    | 36.7  | 15.0   | 27.6 | 14.4 |
| FEB    | DP     | Nord 500mt     | 6.3    | 37.5  | 14.5   | 28.2 | 13.5 |
| FEB    | DP     | Nord 1000mt    | 5.6    | 30.0  | 18.6   | 32.1 | 13.6 |
| FEB    | DP     | Nord 1500mt    | 0.0    | 55.2  | 15.0   | 13.1 | 16.7 |
| FEB    | DP     | Central 500mt  | 7.6    | 39.7  | 15.3   | 26.9 | 10.5 |
| FEB    | DP     | Central 1000mt | 4.7    | 44.1  | 10.4   | 32.6 | 8.2  |
| FEB    | DP     | Central 1500mt | 0.2    | 37.3  | 18.1   | 34.1 | 10.4 |
| FEB    | DP     | South 500mt    | 6.9    | 37.7  | 17.9   | 27.6 | 9.8  |
| FEB    | DP     | South 1000mt   | 7.9    | 40.0  | 15.4   | 27.8 | 8.9  |
| FEB    | DP     | South 1500mt   | 8.0    | 39.7  | 15.9   | 29.2 | 7.2  |
| APR    | DP     | River Mouth    | 6.9    | 30.2  | 22.6   | 24.4 | 15.8 |
| APR    | DP     | Nord 500mt     | 19.8   | 28.4  | 18.2   | 28.4 | 5.2  |
| APR    | DP     | Nord 1000mt    | 8.2    | 45.9  | 22.3   | 19.6 | 4.0  |
| APR    | DP     | Nord 1500mt    | 6.8    | 36.8  | 21.3   | 26.8 | 8.3  |
| APR    | DP     | Central 500mt  | 7.5    | 43.1  | 20.1   | 23.2 | 6.1  |
| APR    | DP     | Central 1000mt | 7.0    | 38.1  | 23.8   | 25.4 | 5.7  |
| APR    | DP     | Central 1500mt | 5.0    | 38.0  | 25.2   | 23.9 | 8.0  |
| APR    | DP     | South 500mt    | 8.0    | 37.7  | 33.7   | 20.0 | 0.6  |
| APR    | DP     | South 1000mt   | 7.0    | 34.3  | 28.6   | 22.5 | 7.6  |
| APR    | DP     | South 1500mt   | 4.3    | 36.0  | 30.4   | 20.2 | 9.1  |
| JUL    | DP     | River Mouth    | 11.2   | 29.4  | 21.7   | 23.0 | 14.7 |
| JUL    | DP     | Nord 500mt     | 8.3    | 37.3  | 33.4   | 20.9 | 0.1  |
| JUL    | DP     | Nord 1000mt    | 4.0    | 36.3  | 33.0   | 19.5 | 7.2  |
| JUL    | DP     | Nord 1500mt    | 19.9   | 32.8  | 23.2   | 17.3 | 6.9  |
| JUL    | DP     | Central 500mt  | 8.7    | 39.3  | 30.0   | 21.6 | 0.4  |
| JUL    | DP     | Central 1000mt | 6.8    | 33.6  | 29.6   | 21.2 | 8.7  |
| JUL    | DP     | Central 1500mt | 4.7    | 33.9  | 31.2   | 22.6 | 7.7  |
| JUL    | DP     | South 500mt    | 18.9   | 32.6  | 31.3   | 16.8 | 0.4  |
| JUL    | DP     | South 1000mt   | 6.2    | 38.8  | 26.9   | 21.1 | 7.1  |
| JUL    | DP     | South 1500mt   | 4.9    | 34.4  | 31.8   | 20.4 | 8.5  |

**Table S2.** Percentage of PCBs in the different seasons in the suspended particulate matter (SPM) from Sele River (Southern Italy).

| Season | Matrix | Site           | % PCBs |       |       |      |      |
|--------|--------|----------------|--------|-------|-------|------|------|
|        |        |                | DI+TRI | TETRA | PENTA | ESA  | EPTA |
| NOV    | SPM    | River Mouth    | 7.3    | 32.1  | 37.6  | 16.5 | 6.5  |
| NOV    | SPM    | Nord 500mt     | 6.8    | 35.1  | 31.2  | 19.4 | 7.4  |
| NOV    | SPM    | Nord 1000mt    | 7.1    | 34.1  | 26.0  | 24.2 | 8.6  |
| NOV    | SPM    | Nord 1500mt    | 4.3    | 36.6  | 30.3  | 22.6 | 6.3  |
| NOV    | SPM    | Central 500mt  | 7.8    | 39.3  | 27.2  | 20.9 | 4.7  |
| NOV    | SPM    | Central 1000mt | 7.7    | 38.5  | 18.0  | 28.3 | 7.4  |
| NOV    | SPM    | Central 1500mt | 6.5    | 36.4  | 17.5  | 30.2 | 9.5  |
| NOV    | SPM    | South 500mt    | 8.0    | 36.5  | 32.4  | 18.6 | 4.5  |
| NOV    | SPM    | South 1000mt   | 8.0    | 37.5  | 30.6  | 19.4 | 4.6  |
| NOV    | SPM    | South 1500mt   | 6.9    | 30.2  | 32.3  | 23.4 | 7.2  |
| FEB    | SPM    | River Mouth    | 7.4    | 31.5  | 38.8  | 15.9 | 6.3  |
| FEB    | SPM    | Nord 500mt     | 8.0    | 36.8  | 31.8  | 18.8 | 4.6  |
| FEB    | SPM    | Nord 1000mt    | 7.2    | 33.3  | 28.3  | 23.0 | 8.2  |
| FEB    | SPM    | Nord 1500mt    | 13.6   | 31.8  | 22.6  | 18.7 | 13.4 |
| FEB    | SPM    | Central 500mt  | 12.4   | 27.9  | 33.1  | 15.6 | 11.0 |
| FEB    | SPM    | Central 1000mt | 8.3    | 37.4  | 22.3  | 24.3 | 7.7  |
| FEB    | SPM    | Central 1500mt | 10.5   | 13.3  | 60.6  | 5.9  | 9.8  |
| FEB    | SPM    | South 500mt    | 7.7    | 31.6  | 33.9  | 19.5 | 7.4  |
| FEB    | SPM    | South 1000mt   | 8.3    | 35.4  | 26.6  | 22.2 | 7.5  |
| FEB    | SPM    | South 1500mt   | 8.4    | 37.3  | 23.4  | 24.2 | 6.8  |
| APR    | SPM    | River Mouth    | 7.3    | 28.7  | 29.4  | 21.1 | 13.5 |
| APR    | SPM    | Nord 500mt     | 8.7    | 29.3  | 38.0  | 19.5 | 4.5  |
| APR    | SPM    | Nord 1000mt    | 10.6   | 13.1  | 53.9  | 14.5 | 7.9  |
| APR    | SPM    | Nord 1500mt    | 11.2   | 15.7  | 18.5  | 42.2 | 12.4 |
| APR    | SPM    | Central 500mt  | 7.5    | 44.6  | 7.6   | 16.4 | 23.8 |
| APR    | SPM    | Central 1000mt | 20.7   | 33.8  | 15.1  | 18.8 | 11.6 |
| APR    | SPM    | Central 1500mt | 0.5    | 49.8  | 17.1  | 27.6 | 4.9  |
| APR    | SPM    | South 500mt    | 7.4    | 33.7  | 32.1  | 17.6 | 9.3  |
| APR    | SPM    | South 1000mt   | 4.6    | 45.4  | 24.0  | 18.7 | 7.2  |
| APR    | SPM    | South 1500mt   | 2.0    | 44.8  | 23.8  | 19.9 | 9.6  |
| JUL    | SPM    | River Mouth    | 11.1   | 29.1  | 23.2  | 22.3 | 14.3 |
| JUL    | SPM    | Nord 500mt     | 1.3    | 30.5  | 18.4  | 25.2 | 24.7 |
| JUL    | SPM    | Nord 1000mt    | 5.0    | 35.1  | 19.2  | 11.6 | 29.0 |
| JUL    | SPM    | Nord 1500mt    | 7.2    | 41.5  | 26.4  | 19.6 | 5.4  |
| JUL    | SPM    | Central 500mt  | 4.0    | 35.8  | 32.5  | 20.5 | 7.2  |
| JUL    | SPM    | Central 1000mt | 6.0    | 32.8  | 27.1  | 19.2 | 14.9 |
| JUL    | SPM    | Central 1500mt | 5.1    | 40.2  | 19.9  | 26.8 | 8.0  |
| JUL    | SPM    | South 500mt    | 9.1    | 37.2  | 26.6  | 20.6 | 6.4  |
| JUL    | SPM    | South 1000mt   | 9.2    | 38.8  | 23.2  | 22.1 | 6.8  |
| JUL    | SPM    | South 1500mt   | 0.0    | 8.4   | 65.3  | 14.0 | 12.3 |

**Table S3.** Percentage of PCBs in the April month in the sediment samples (SED) from Sele River (Southern Italy).

| Season | Matrix | Site           | % PCBs |       |       |      |      |
|--------|--------|----------------|--------|-------|-------|------|------|
|        |        |                | DI+TRI | TETRA | PENTA | ESA  | EPTA |
| APR    | SED    | River Mouth    | 5.1    | 20.0  | 31.0  | 25.7 | 18.2 |
| APR    | SED    | Nord 500mt     | 0.8    | 32.2  | 39.2  | 23.2 | 4.5  |
| APR    | SED    | Nord 1000mt    | 4.8    | 18.7  | 29.0  | 24.2 | 23.3 |
| APR    | SED    | Nord 1500mt    | 7.9    | 27.8  | 36.4  | 17.9 | 10.0 |
| APR    | SED    | Central 500mt  | 0.8    | 32.2  | 39.2  | 23.3 | 4.5  |
| APR    | SED    | Central 1000mt | 1.1    | 23.0  | 32.6  | 25.3 | 18.1 |
| APR    | SED    | Central 1500mt | 1.0    | 23.0  | 32.1  | 25.6 | 18.4 |
| APR    | SED    | South 500mt    | 0.9    | 32.2  | 39.3  | 23.2 | 4.5  |
| APR    | SED    | South 1000mt   | 0.9    | 32.6  | 39.8  | 22.4 | 4.3  |
| APR    | SED    | South 1500mt   | 4.6    | 18.8  | 29.0  | 24.2 | 23.3 |

**Table S4.** Environmental data from sampling sites.

| Site Number<br>Identification | Sampling<br>Site                    | pH  |      |     |     | Temperature (°C) |      |      |      | Salinity (‰) |      |      |      |
|-------------------------------|-------------------------------------|-----|------|-----|-----|------------------|------|------|------|--------------|------|------|------|
|                               |                                     | Apr | Jul  | Nov | Feb | Apr              | Jul  | Nov  | Feb  | Apr          | Jul  | Nov  | Feb  |
| 1<br>(river water)            | Sele River<br>Source                | 7.1 | 7.8  | 7.0 | 7.5 | 20.2             | 25.0 | 19.5 | 15.1 | 9.9          | 7.4  | 8.6  | 7.9  |
| 2<br>(sea water)              | River Mouth<br>at 500mt North       | 7.0 | 7.21 | 7.3 | 7.2 | 22.4             | 23.9 | 17.6 | 15.3 | 10.7         | 11.3 | 7.8  | 10.7 |
| 3<br>(sea water)              | River Mouth<br>at 500mt<br>Central  | 7.4 | 7.5  | 7.8 | 7.2 | 20.6             | 23.5 | 19.2 | 14.5 | 10.7         | 9.3  | 6.6  | 10.0 |
| 4<br>(sea water)              | River Mouth<br>at 500mt South       | 7.0 | 7.5  | 7.0 | 7.5 | 19.8             | 24.3 | 18.0 | 14.9 | 8.3          | 9.0  | 5.2  | 7.8  |
| 5<br>(sea water)              | River Mouth<br>at 1000mt<br>North   | 6.7 | 7.4  | 7.1 | 7.3 | 21.4             | 22.9 | 18.3 | 18.2 | 13.2         | 13.7 | 13.4 | 12.9 |
| 6<br>(sea water)              | River Mouth<br>at 1000mt<br>Central | 7.8 | 7.3  | 7.5 | 7.2 | 18.9             | 24.7 | 19.0 | 15.5 | 18.4         | 12.1 | 15.2 | 11.7 |
| 7<br>(sea water)              | River Mouth<br>at 1000mt<br>South   | 7.7 | 7.2  | 7.2 | 7.6 | 22.4             | 23.2 | 17.9 | 17.6 | 14.9         | 16.0 | 15.5 | 15.7 |
| 8<br>(sea water)              | River Mouth<br>at 1500mt<br>North   | 7.2 | 7.5  | 7.1 | 6.8 | 21.4             | 24.9 | 18.8 | 15.4 | 19.2         | 22.7 | 23.6 | 23.8 |
| 9<br>(sea water)              | River Mouth<br>at 1500mt<br>Central | 7.2 | 7.8  | 7.9 | 7.3 | 22.1             | 25.1 | 19.6 | 14.9 | 21.4         | 22.7 | 22.1 | 22.6 |
| 10<br>(sea water)             | River Mouth<br>at 1500mt<br>South   | 7.5 | 7.6  | 7.2 | 7.3 | 21.1             | 23.  | 18.5 | 15.4 | 21.2         | 22.2 | 20.8 | 21.6 |

**Table S5.** Percentage of OCPs in the different seasons in the water samples (DP) from Sele River (Southern Italy).

| Season | Matrix | Site           | % OCPs |      |       |
|--------|--------|----------------|--------|------|-------|
|        |        |                | HCH    | DDT  | CYCLO |
| NOV    | DP     | River Mouth    | 21.0   | 18.2 | 60.7  |
| NOV    | DP     | Nord 500mt     | 31.5   | 14.7 | 53.8  |
| NOV    | DP     | Nord 1000mt    | 32.7   | 14.7 | 52.6  |
| NOV    | DP     | Nord 1500mt    | 31.2   | 12.8 | 56.1  |
| NOV    | DP     | Central 500mt  | 19.9   | 18.0 | 62.1  |
| NOV    | DP     | Central 1000mt | 31.6   | 9.4  | 59.0  |
| NOV    | DP     | Central 1500mt | 36.2   | 0.0  | 63.8  |
| NOV    | DP     | South 500mt    | 34.7   | 16.2 | 49.2  |
| NOV    | DP     | South 1000mt   | 58.1   | 0.0  | 41.9  |
| NOV    | DP     | South 1500mt   | 63.3   | 16.2 | 20.6  |
| FEB    | DP     | River Mouth    | 0.4    | 29.8 | 69.8  |
| FEB    | DP     | Nord 500mt     | 45.2   | 22.6 | 32.2  |
| FEB    | DP     | Nord 1000mt    | 9.9    | 33.9 | 56.2  |
| FEB    | DP     | Nord 1500mt    | 4.2    | 71.5 | 24.2  |
| FEB    | DP     | Central 500mt  | 6.5    | 45.1 | 48.4  |
| FEB    | DP     | Central 1000mt | 11.5   | 55.2 | 33.3  |
| FEB    | DP     | Central 1500mt | 0.0    | 34.0 | 66.0  |
| FEB    | DP     | South 500mt    | 39.2   | 37.0 | 23.8  |
| FEB    | DP     | South 1000mt   | 31.2   | 30.7 | 38.1  |
| FEB    | DP     | South 1500mt   | 42.3   | 32.0 | 25.7  |
| APR    | DP     | River Mouth    | 0.0    | 26.8 | 73.2  |
| APR    | DP     | Nord 500mt     | 20.1   | 17.1 | 62.8  |
| APR    | DP     | Nord 1000mt    | 30.3   | 25.9 | 43.7  |
| APR    | DP     | Nord 1500mt    | 63.5   | 0.0  | 36.5  |
| APR    | DP     | Central 500mt  | 36.0   | 22.2 | 41.8  |
| APR    | DP     | Central 1000mt | 32.1   | 23.5 | 44.3  |
| APR    | DP     | Central 1500mt | 45.5   | 11.9 | 42.6  |
| APR    | DP     | South 500mt    | 26.7   | 39.1 | 34.2  |
| APR    | DP     | South 1000mt   | 33.3   | 21.9 | 44.8  |
| APR    | DP     | South 1500mt   | 34.9   | 23.5 | 41.7  |
| JUL    | DP     | River Mouth    | 0.1    | 22.5 | 77.5  |
| JUL    | DP     | Nord 500mt     | 29.2   | 29.3 | 41.5  |
| JUL    | DP     | Nord 1000mt    | 25.5   | 33.8 | 40.6  |
| JUL    | DP     | Nord 1500mt    | 29.8   | 24.2 | 45.9  |
| JUL    | DP     | Central 500mt  | 39.1   | 14.8 | 46.1  |
| JUL    | DP     | Central 1000mt | 3.5    | 66.7 | 29.8  |
| JUL    | DP     | Central 1500mt | 16.5   | 58.7 | 24.8  |
| JUL    | DP     | South 500mt    | 26.9   | 15.3 | 57.8  |
| JUL    | DP     | South 1000mt   | 33.2   | 14.7 | 52.1  |
| JUL    | DP     | South 1500mt   | 32.7   | 25.2 | 42.1  |

**Table S6.** Percentage of OCPs in the different seasons in the suspended particulate matter (SPM) from Sele River (Southern Italy).

| Season | Matrix | Site           | % OCPs |      |       |
|--------|--------|----------------|--------|------|-------|
|        |        |                | HCH    | DDT  | CYCLO |
| NOV    | SPM    | River Mouth    | 19.0   | 22.6 | 58.4  |
| NOV    | SPM    | Nord 500mt     | 41.3   | 14.8 | 43.9  |
| NOV    | SPM    | Nord 1000mt    | 33.3   | 7.8  | 58.9  |
| NOV    | SPM    | Nord 1500mt    | 37.5   | 12.0 | 50.5  |
| NOV    | SPM    | Central 500mt  | 33.8   | 26.1 | 40.1  |
| NOV    | SPM    | Central 1000mt | 35.0   | 9.8  | 55.2  |
| NOV    | SPM    | Central 1500mt | 65.2   | 0.0  | 34.8  |
| NOV    | SPM    | South 500mt    | 39.8   | 14.5 | 45.8  |
| NOV    | SPM    | South 1000mt   | 45.2   | 0.0  | 54.8  |
| NOV    | SPM    | South 1500mt   | 56.8   | 15.0 | 28.2  |
| FEB    | SPM    | River Mouth    | 16.9   | 16.9 | 66.2  |
| FEB    | SPM    | Nord 500mt     | 33.8   | 16.5 | 49.6  |
| FEB    | SPM    | Nord 1000mt    | 10.0   | 32.7 | 57.3  |
| FEB    | SPM    | Nord 1500mt    | 9.8    | 45.0 | 45.1  |
| FEB    | SPM    | Central 500mt  | 8.8    | 41.6 | 49.6  |
| FEB    | SPM    | Central 1000mt | 11.3   | 57.6 | 31.1  |
| FEB    | SPM    | Central 1500mt | 0.0    | 32.8 | 67.2  |
| FEB    | SPM    | South 500mt    | 35.9   | 21.1 | 43.0  |
| FEB    | SPM    | South 1000mt   | 31.7   | 32.5 | 35.8  |
| FEB    | SPM    | South 1500mt   | 51.4   | 22.1 | 26.5  |
| APR    | SPM    | River Mouth    | 40.3   | 13.7 | 46.0  |
| APR    | SPM    | Nord 500mt     | 50.0   | 29.1 | 20.9  |
| APR    | SPM    | Nord 1000mt    | 60.6   | 30.1 | 9.3   |
| APR    | SPM    | Nord 1500mt    | 76.3   | 0.0  | 23.7  |
| APR    | SPM    | Central 500mt  | 35.1   | 23.7 | 41.2  |
| APR    | SPM    | Central 1000mt | 40.8   | 10.9 | 48.3  |
| APR    | SPM    | Central 1500mt | 71.8   | 18.7 | 9.5   |
| APR    | SPM    | South 500mt    | 40.1   | 14.4 | 45.5  |
| APR    | SPM    | South 1000mt   | 34.4   | 24.6 | 41.0  |
| APR    | SPM    | South 1500mt   | 9.1    | 24.3 | 66.6  |
| JUL    | SPM    | River Mouth    | 37.6   | 17.1 | 45.3  |
| JUL    | SPM    | Nord 500mt     | 49.3   | 0.4  | 50.3  |
| JUL    | SPM    | Nord 1000mt    | 49.8   | 0.4  | 49.8  |
| JUL    | SPM    | Nord 1500mt    | 81.8   | 0.7  | 17.5  |
| JUL    | SPM    | Central 500mt  | 67.1   | 27.3 | 5.6   |
| JUL    | SPM    | Central 1000mt | 4.9    | 83.9 | 11.2  |
| JUL    | SPM    | Central 1500mt | 6.8    | 87.7 | 5.5   |
| JUL    | SPM    | South 500mt    | 39.3   | 40.3 | 20.4  |
| JUL    | SPM    | South 1000mt   | 1.8    | 98.2 | 0.0   |
| JUL    | SPM    | South 1500mt   | 5.3    | 94.7 | 0.0   |

**Table S7.** Percentage of OCPs in the April month in the sediment samples (SED) from Sele River (Southern Italy).

| Season | Matrix | Site           | % OCPs |      |       |
|--------|--------|----------------|--------|------|-------|
|        |        |                | HCH    | DDT  | CYCLO |
| APR    | SED    | River Mouth    | 13.6   | 52.8 | 33.6  |
| APR    | SED    | Nord 500mt     | 5.2    | 30.3 | 64.5  |
| APR    | SED    | Nord 1000mt    | 4.8    | 31.2 | 64.0  |
| APR    | SED    | Nord 1500mt    | 4.5    | 8.6  | 86.8  |
| APR    | SED    | Central 500mt  | 6.6    | 30.9 | 62.5  |
| APR    | SED    | Central 1000mt | 4.8    | 83.3 | 11.9  |
| APR    | SED    | Central 1500mt | 16.6   | 22.5 | 60.9  |
| APR    | SED    | South 500mt    | 28.9   | 34.1 | 37.0  |
| APR    | SED    | South 1000mt   | 2.7    | 79.5 | 17.7  |
| APR    | SED    | South 1500mt   | 6.6    | 8.6  | 84.9  |

Table S8. Description of concentration of PCBs in water dissolved phase (DP) samples from Sele River. (Southern Italy)

|                   | 8    | 28   | 37    | 44   | 49   | 52   | 60   | 66   | 70   | 74   | 77   | 82   | 87   | 99   | 101  | 105  | 114  | 118  | 126  | 128  | 138  | 153  | 156  | 158  | 166  | 169  | 170  | 179  | 180  | 183  | 187  | 189  |  |
|-------------------|------|------|-------|------|------|------|------|------|------|------|------|------|------|------|------|------|------|------|------|------|------|------|------|------|------|------|------|------|------|------|------|------|--|
| November          |      |      |       |      |      |      |      |      |      |      |      |      |      |      |      |      |      |      |      |      |      |      |      |      |      |      |      |      |      |      |      |      |  |
| River Mouth       | 0.76 | 0.21 | 0.02  | 0.82 | 0.46 | 0.14 | 0.64 | 0.10 | 0.59 | 0.18 | 0.32 | 0.01 | 0.08 | 0.08 | 0.06 | 0.02 | 0.07 | 0.27 | 0.04 | ND   | 0.10 | 0.09 | 0.15 | 0.48 | 0.30 | 0.01 | 0.43 | 0.09 | 0.13 | 0.03 | 0.29 | 0.02 |  |
| Nord at 500mt     | 0.37 | 0.09 | 0.05  | 0.33 | 0.10 | 0.12 | 0.05 | 0.62 | 0.60 | 0.20 | 0.06 | 0.16 | 0.07 | 0.11 | 0.14 | 0.02 | 0.20 | 0.29 | 0.24 | 0.47 | 0.05 | 0.27 | 0.52 | 0.48 | 0.31 | 0.09 | 0.22 | 0.09 | 0.09 | 0.06 | 0.03 | 0.07 |  |
| Nord at 1000mt    | 0.39 | 0.01 | 0.07  | 0.40 | 0.19 | 0.13 | 0.38 | 0.85 | 0.35 | 0.01 | 0.06 | 0.06 | 0.09 | 0.04 | 0.30 | ND   | 0.67 | 0.31 | 0.22 | 0.57 | ND   | 0.26 | ND   | 0.45 | 0.17 | 0.09 | 0.11 | 0.09 | 0.04 | 0.01 | 0.01 | 0.02 |  |
| Nord at 1500mt    | 0.31 | ND   | 0.02  | 0.32 | 0.42 | 0.12 | 0.30 | 0.09 | 0.54 | 0.05 | 0.03 | 0.26 | 0.07 | 0.04 | 0.02 | 0.01 | 0.20 | 0.24 | 0.07 | 0.25 | 0.14 | 0.26 | 0.02 | 0.39 | 0.15 | 0.08 | 0.13 | 0.01 | 0.08 | 0.01 | 0.17 | 0.04 |  |
| Central at 500mt  | 0.34 | 0.08 | 0.02  | 0.32 | 0.10 | 0.13 | 0.05 | 0.68 | 0.55 | 0.65 | 0.02 | 0.17 | 0.07 | 0.03 | 0.56 | 0.01 | 0.20 | 0.23 | 0.07 | 0.23 | 0.08 | 0.30 | 0.01 | 0.13 | 0.49 | 0.05 | 0.09 | 0.02 | 0.04 | 0.02 | 1.02 | 0.07 |  |
| Central at 1000mt | 0.39 | 0.01 | 0.07  | 0.40 | 0.19 | 0.13 | 0.38 | 0.85 | 0.35 | 0.01 | 0.06 | 0.06 | 0.09 | 0.04 | 0.30 | ND   | 0.67 | 0.31 | 0.22 | 0.57 | ND   | 0.26 | ND   | 0.45 | 0.17 | 0.09 | 0.51 | 0.06 | 0.04 | 0.01 | 0.03 | 0.02 |  |
| Central at 1500mt | 0.30 | 0.02 | 0.02  | 0.31 | 0.41 | 0.12 | 0.30 | 0.09 | 0.53 | ND   | 0.03 | 0.36 | 0.07 | 0.07 | 0.02 | ND   | 0.21 | 0.26 | 0.10 | 0.27 | 0.12 | 0.25 | 0.03 | 0.39 | 0.16 | 0.11 | 0.13 | 0.01 | 0.08 | 0.01 | 0.17 | 0.06 |  |
| South at 500mt    | 0.35 | 0.12 | 0.08  | 0.31 | 0.47 | 0.13 | 0.34 | 0.11 | 0.58 | 0.19 | 0.41 | 0.41 | 0.08 | 0.12 | 0.15 | ND   | 0.58 | 0.28 | 0.43 | 0.42 | 0.17 | 0.34 | 0.11 | 0.44 | 0.28 | 0.11 | 0.39 | 0.09 | 0.10 | 0.03 | 0.12 | 0.08 |  |
| South at 1000mt   | 0.32 | 0.12 | 0.07  | 0.30 | 0.44 | 0.12 | 0.38 | 0.10 | 0.60 | 0.07 | 0.35 | 0.30 | 0.07 | 0.06 | 0.07 | ND   | 0.64 | 0.27 | 0.41 | 0.40 | 0.16 | 0.20 | 0.10 | 0.35 | 0.18 | 0.10 | 0.26 | 0.08 | 0.09 | 0.02 | 0.07 | 0.08 |  |
| South at 1500mt   | 0.30 | 0.07 | 0.06  | 0.27 | 0.42 | 0.11 | 0.04 | 0.10 | 0.05 | 0.03 | 0.07 | 0.07 | 0.07 | 0.01 | ND   | ND   | 0.50 | 0.24 | 0.37 | 0.30 | 0.10 | 0.08 | 0.08 | 0.33 | 0.06 | 0.09 | 0.25 | 0.04 | 0.03 | 0.02 | 0.09 | 0.07 |  |
| February          |      |      |       |      |      |      |      |      |      |      |      |      |      |      |      |      |      |      |      |      |      |      |      |      |      |      |      |      |      |      |      |      |  |
| River Mouth       | 0.09 | 0.05 | 0.02  | 0.03 | 0.42 | 0.01 | 0.49 | 0.99 | 0.56 | 0.05 | 0.07 | 0.13 | 0.07 | 0.03 | 0.01 | ND   | 0.09 | ND   | 0.01 | 0.06 | 0.05 | 0.31 | 0.04 | 0.02 | 0.15 | ND   | 0.06 | 0.02 | 0.08 | 0.10 | 0.09 | 0.10 |  |
| Nord at 500mt     | 0.28 | ND   | 0.02  | 0.29 | 0.39 | 0.11 | 0.30 | 0.09 | 0.53 | 0.03 | 0.02 | 0.05 | 0.06 | 0.01 | 0.03 | ND   | 0.20 | 0.24 | 0.08 | 0.25 | 0.12 | 0.26 | 0.05 | 0.39 | 0.16 | 0.09 | 0.27 | 0.02 | 0.08 | 0.03 | 0.17 | 0.05 |  |
| Nord at 1000mt    | 0.20 | ND   | 0.02  | 0.27 | 0.24 | 0.10 | 0.19 | 0.09 | 0.23 | ND   | 0.06 | 0.01 | 0.07 | 0.02 | 0.14 | ND   | 0.20 | 0.24 | 0.07 | 0.25 | 0.09 | 0.27 | 0.04 | 0.38 | 0.16 | 0.08 | 0.21 | 0.02 | 0.08 | 0.03 | 0.16 | 0.03 |  |
| Nord at 1500mt    | ND   | ND   | ND    | 0.04 | 0.23 | 0.12 | 0.30 | ND   | 0.55 | 0.03 | 0.06 | 0.02 | 0.07 | ND   | 0.02 | ND   | ND   | 0.25 | ND   | ND   | 0.05 | ND   | 0.04 | ND   | 0.14 | 0.08 | 0.09 | ND   | 0.08 | 0.02 | 0.16 | 0.04 |  |
| Central at 500mt  | 0.32 | 0.03 | 0.02  | 0.30 | 0.38 | 0.11 | 0.34 | 0.10 | 0.56 | 0.05 | 0.06 | 0.04 | 0.07 | 0.04 | 0.03 | 0.01 | 0.21 | 0.25 | 0.08 | 0.26 | 0.07 | 0.28 | 0.03 | 0.40 | 0.16 | 0.06 | 0.18 | 0.02 | 0.08 | 0.02 | 0.16 | 0.02 |  |
| Central at 1000mt | 0.17 | ND   | ND    | 0.28 | 0.37 | 0.10 | 0.30 | ND   | 0.52 | 0.03 | 0.06 | 0.03 | 0.07 | 0.03 | 0.02 | ND   | ND   | 0.25 | ND   | 0.25 | 0.06 | 0.16 | 0.03 | 0.39 | 0.16 | 0.07 | 0.09 | ND   | 0.08 | 0.01 | 0.08 | 0.04 |  |
| Central at 1500mt | ND   | 0.01 | ND    | 0.16 | 0.22 | 0.10 | 0.29 | ND   | ND   | 0.01 | 0.08 | 0.07 | 0.06 | 0.04 | ND   | ND   | ND   | 0.14 | ND   | 0.15 | 0.07 | 0.11 | ND   | 0.05 | 0.12 | 0.08 | 0.11 | ND   | 0.07 | 0.01 | ND   | 0.04 |  |
| South at 500mt    | 0.80 | 0.03 | 0.02  | 0.29 | 0.37 | 0.11 | 0.30 | 0.10 | 0.58 | 0.07 | 0.08 | 0.07 | 0.08 | 0.03 | 0.08 | ND   | 0.20 | 0.26 | 0.08 | 0.28 | 0.16 | 0.30 | 0.02 | 0.09 | 0.16 | 0.08 | 0.13 | 0.02 | 0.08 | 0.06 | 0.08 | 0.02 |  |
| South at 1000mt   | 0.31 | 0.05 | 0.02  | 0.29 | 0.37 | 0.11 | 0.33 | 0.10 | 0.60 | 0.04 | 0.06 | 0.03 | 0.07 | 0.07 | ND   | 0.01 | 0.21 | 0.26 | 0.09 | 0.26 | 0.05 | 0.30 | 0.03 | 0.42 | 0.18 | 0.07 | 0.13 | 0.02 | 0.08 | 0.02 | 0.13 | 0.04 |  |
| South at 1500mt   | 0.30 | 0.02 | ND    | 0.08 | 0.02 | 0.11 | 0.29 | ND   | 0.52 | ND   | ND   | 0.02 | 0.06 | 0.02 | 0.01 | ND   | 0.20 | 0.24 | 0.07 | 0.24 | 0.06 | 0.06 | 0.02 | 0.24 | 0.15 | 0.08 | 0.09 | ND   | 0.08 | 0.06 | 0.07 | 0.04 |  |
| April             |      |      |       |      |      |      |      |      |      |      |      |      |      |      |      |      |      |      |      |      |      |      |      |      |      |      |      |      |      |      |      |      |  |
| River Mouth       | 0.38 | 0.66 | 0.69  | 0.02 | 0.14 | 0.13 | 0.23 | 0.10 | 0.57 | 0.15 | 0.18 | 1.29 | 0.07 | 0.08 | 0.04 | 0.02 | 0.08 | 0.08 | 0.45 | 0.05 | 0.19 | 0.28 | 0.03 | 0.07 | 0.27 | 0.02 | 0.06 | 0.09 | 0.14 | 0.08 | 0.05 | 0.12 |  |
| Nord at 500mt     | 0.09 | 0.08 | 0.06  | 0.06 | 0.10 | 0.13 | 0.05 | 0.86 | 0.64 | 0.17 | 0.09 | 0.07 | 0.07 | 0.01 | 0.15 | 0.02 | 0.20 | 0.26 | 0.33 | 0.50 | 0.07 | 0.27 | 0.56 | 0.09 | 0.30 | 0.09 | 0.09 | 0.08 | 0.08 | 0.05 | 0.03 | 0.06 |  |
| Nord at 1000mt    | 0.40 | 0.09 | 0.02  | 0.35 | 0.10 | 0.13 | 0.34 | 0.74 | 0.62 | 0.51 | 0.06 | 0.15 | 0.07 | 0.03 | 0.59 | 0.02 | 0.21 | 0.25 | 0.07 | 0.23 | 0.09 | 0.32 | 0.02 | 0.13 | 0.37 | 0.05 | 0.11 | 0.02 | 0.04 | 0.02 | 0.02 | 0.05 |  |
| Nord at 1500mt    | 0.10 | 0.03 | 0.02  | 0.34 | 0.38 | 0.11 | 0.33 | 0.09 | 0.54 | 0.02 | 0.06 | 0.14 | 0.06 | 0.02 | 0.34 | ND   | 0.20 | 0.24 | 0.07 | 0.25 | 0.16 | 0.29 | 0.02 | 0.39 | 0.18 | 0.09 | 0.11 | 0.01 | 0.08 | 0.02 | 0.17 | 0.04 |  |
| Central at 500mt  | 0.39 | 0.06 | 0.06  | 0.38 | 0.43 | 0.13 | 0.36 | 0.71 | 0.71 | 0.18 | 0.13 | 0.08 | 0.05 | 0.03 | 0.14 | ND   | 0.57 | 0.27 | 0.17 | 0.49 | 0.03 | 0.28 | 0.02 | 0.40 | 0.27 | 0.03 | 0.01 | 0.02 | 0.02 | 0.02 | 0.03 | 0.04 |  |
| Central at 1000mt | 0.35 | 0.03 | 0.06  | 1.34 | 0.39 | 0.12 | 0.32 | 0.74 | 0.37 | 0.07 | 0.08 | 0.14 | 0.08 | 0.06 | 0.13 | ND   | 0.01 | 0.26 | 0.23 | 0.43 | 0.02 | 0.36 | 0.07 | 0.04 | 0.18 | 0.05 | 0.10 | 0.08 | 0.09 | 0.02 | 0.08 | 0.04 |  |
| Central at 1500mt | 0.20 | 0.03 | 0.02  | 0.22 | 0.42 | 0.12 | 0.31 | 0.10 | 0.59 | 0.05 | 0.07 | 0.38 | 0.07 | 0.04 | 0.15 | 0.01 | 0.23 | 0.26 | 0.09 | 0.12 | 0.51 | 0.24 | 0.03 | 0.41 | 0.16 | 0.10 | 0.09 | 0.02 | 0.06 | 0.01 | 0.14 | 0.06 |  |
| South at 500mt    | 0.37 | 0.12 | 0.08  | 0.32 | 0.49 | 0.13 | 0.36 | 0.51 | 0.61 | 0.23 | 0.40 | 0.60 | 0.08 | 0.16 | 0.17 | ND   | 0.61 | 0.29 | 0.46 | 0.31 | 0.16 | 0.07 | 0.11 | 0.40 | 0.25 | 0.10 | 0.46 | 0.09 | 0.10 | 0.02 | 0.60 | 0.08 |  |
| South at 1000mt   | 0.34 | 0.08 | 0.06  | 0.32 | 0.39 | 0.12 | 0.37 | 0.10 | 0.99 | 0.12 | 0.35 | 0.07 | 0.08 | 0.10 | 0.16 | 0.01 | 0.68 | 0.27 | 0.41 | 0.41 | 0.13 | 0.05 | 0.10 | 0.39 | 0.19 | 0.09 | 0.22 | 0.06 | 0.08 | 0.02 | 0.07 | 0.07 |  |
| South at 1500mt   | 0.18 | 0.01 | 0.07  | 0.35 | 0.45 | 0.11 | 0.29 | 0.12 | 0.61 | ND   | 0.12 | 0.68 | 0.07 | 0.02 | 0.25 | 0.01 | 0.63 | 0.26 | 0.39 | 0.25 | 0.18 | 0.17 | 0.08 | 0.37 | 0.15 | 0.09 | 0.21 | 0.07 | 0.09 | 0.32 | 0.18 | 0.21 |  |
| July              |      |      |       |      |      |      |      |      |      |      |      |      |      |      |      |      |      |      |      |      |      |      |      |      |      |      |      |      |      |      |      |      |  |
| River Mouth       | 1.57 | 0.40 | 0.15  | 1.58 | 0.48 | 0.14 | 0.35 | 0.13 | 0.64 | 0.21 | 0.43 | 0.42 | 0.08 | 0.16 | 0.03 | 0.09 | 0.62 | 0.28 | 0.68 | 0.73 | 0.25 | 0.02 | 0.17 | 0.59 | 0.32 | 0.12 | 0.67 | 0.15 | 0.13 | 0.06 | 0.22 | 0.17 |  |
| Nord at 500mt     | 0.36 | 0.12 | 0.10  | 0.32 | 0.48 | 0.13 | 0.35 | 0.10 | 0.09 | 0.23 | 0.39 | 0.59 | 0.08 | 0.16 | 0.17 | ND   | 0.59 | 0.28 | 0.35 | 0.21 | 0.16 | 0.07 | 0.11 | 0.09 | 0.32 | 0.10 | 0.35 | 0.08 | 0.11 | 0.02 | 0.14 | 0.08 |  |
| Nord at 1000mt    | 0.15 | 0.06 | 0.07  | 0.36 | 0.43 | 0.12 | 0.34 | 0.11 | 0.65 | 0.13 | 0.37 | 0.36 | 0.07 | 0.17 | 0.15 | 0.01 | 0.72 | 0.30 | 0.38 | 0.28 | 0.14 | 0.18 | 0.06 | 0.43 | 0.15 | 0.06 | 0.15 | 0.07 | 0.07 | 0.02 | 0.06 | 0.05 |  |
| Nord at 1500mt    | 0.20 | 0.03 | 0.06  | 0.34 | 0.48 | 0.12 | 0.32 | 0.12 | 0.63 | 0.05 | 0.09 | 0.07 | 0.06 | 0.03 | 0.17 | ND   | 0.57 | 0.24 | 0.37 | 0.26 | 0.06 | 0.15 | 0.06 | 0.35 | 0.16 | 0.09 | 0.17 | 0.07 | 0.08 | 0.01 | 0.07 | 0.05 |  |
| Central at 500mt  | 0.33 | 0.08 | 0.07  | 0.19 | 0.39 | 0.12 | 0.32 | 0.90 | 0.54 | 0.17 | 0.20 | 0.25 | 0.07 | 0.10 | 0.05 | ND   | 0.55 | 0.27 | 0.20 | 0.26 | 0.10 | 0.08 | 0.10 | 0.39 | 0.21 | 0.05 | 0.31 | 0.08 | 0.79 | 0.01 | 0.02 | 0.07 |  |
| Central at 1000mt | 0.31 | 0.04 | 0.06  | 0.30 | 0.38 | 0.12 | 0.61 | 0.79 | 0.26 | 0.05 | 0.06 | 0.07 | 0.07 | 0.04 | 0.16 | 0.01 | 0.67 | 0.25 | 0.45 | 0.26 | 0.11 | 0.15 | 0.06 | 0.03 | 0.06 | 0.09 | 0.20 | 0.05 | 0.01 | 0.02 | 0.07 | 0.06 |  |
| Central at 1500mt | 0.18 | 0.03 | 0.070 |      |      |      |      |      |      |      |      |      |      |      |      |      |      |      |      |      |      |      |      |      |      |      |      |      |      |      |      |      |  |

Table S9. Description of concentration of PCBs in Suspended Particulate Matter (SPM) samples from Sele River. (Southern Italy)

|                                                                                                                               | 8    | 28   | 37   | 44   | 49   | 52   | 60   | 66   | 70   | 74   | 77   | 82   | 87   | 99   | 101  | 105  | 114  | 118  | 126  | 128  | 138  | 153  | 156  | 158  | 166  | 169  | 170  | 179  | 180  | 183  | 187  | 189  |  |
|-------------------------------------------------------------------------------------------------------------------------------|------|------|------|------|------|------|------|------|------|------|------|------|------|------|------|------|------|------|------|------|------|------|------|------|------|------|------|------|------|------|------|------|--|
| Table B9. Description of concentration of PCBs in suspended particulate matter (SPM) samples from ECR River, (Southern Italy) |      |      |      |      |      |      |      |      |      |      |      |      |      |      |      |      |      |      |      |      |      |      |      |      |      |      |      |      |      |      |      |      |  |
| November                                                                                                                      |      |      |      |      |      |      |      |      |      |      |      |      |      |      |      |      |      |      |      |      |      |      |      |      |      |      |      |      |      |      |      |      |  |
| River Mouth                                                                                                                   | 0.94 | 0.18 | 0.23 | 0.07 | 1.26 | 0.25 | 0.99 | 2.00 | 0.77 | 1.85 | 1.17 | 3.88 | 0.19 | 1.27 | 0.37 | 0.14 | 0.35 | 0.75 | 2.18 | 1.05 | 0.77 | 1.08 | 0.20 | 1.10 | 0.84 | 0.25 | 0.72 | 0.13 | 0.20 | 0.13 | 0.51 | 0.20 |  |
| Nord at 500mt                                                                                                                 | 0.39 | 0.17 | 0.10 | 0.41 | 0.52 | 0.13 | 0.39 | 0.79 | 0.69 | 0.23 | 0.17 | 0.80 | 0.08 | 0.22 | 0.43 | 0.02 | 0.23 | 0.32 | 0.85 | 0.37 | 0.20 | 0.35 | 0.05 | 0.48 | 0.24 | 0.13 | 0.20 | 0.06 | 0.05 | 0.03 | 0.24 | 1.38 |  |
| Nord at 1000mt                                                                                                                | 0.34 | 0.10 | 0.02 | 0.36 | 0.46 | 0.12 | 0.34 | 0.10 | 0.61 | 0.13 | 0.11 | 0.60 | 0.07 | 0.15 | 0.25 | 0.01 | 0.22 | 0.29 | 0.11 | 0.32 | 0.16 | 0.30 | 0.04 | 0.43 | 0.20 | 0.12 | 0.17 | 0.01 | 0.09 | 0.02 | 0.21 | 0.07 |  |
| Nord at 1500mt                                                                                                                | ND   | 0.12 | ND   | 0.01 | 0.27 | ND   | ND   | 0.11 | ND   | 0.19 | 0.21 | ND   | 0.08 | 0.15 | ND   | ND   | 0.12 | 0.20 | 0.06 | 0.21 | 0.12 | ND   | ND   | ND   | 0.08 | 0.09 | ND   | ND   | 0.02 | 0.03 | ND   | 0.04 |  |
| Central at 500mt                                                                                                              | 0.01 | 0.26 | 0.08 | 0.51 | 0.56 | 0.14 | 0.48 | 0.95 | 0.75 | 0.54 | 0.34 | 0.61 | 0.09 | 0.27 | 0.73 | 0.03 | 0.65 | 0.31 | 0.22 | 0.20 | 0.11 | 0.10 | 0.03 | 0.10 | 0.12 | 0.10 | 0.17 | 0.12 | 0.10 | 0.04 | 0.03 | 0.05 |  |
| Central at 1000mt                                                                                                             | 0.31 | 0.02 | ND   | 0.29 | 0.04 | 0.12 | 0.31 | ND   | 0.14 | ND   | 0.05 | 0.02 | 0.07 | 0.02 | 0.01 | ND   | ND   | 0.25 | 0.41 | 0.25 | 0.06 | 0.27 | 0.03 | 0.36 | 0.16 | 0.04 | 0.09 | 0.02 | 0.04 | 0.01 | 0.07 | 0.04 |  |
| Central at 1500mt                                                                                                             | 0.10 | 0.01 | ND   | 0.13 | 0.19 | 0.09 | ND   | ND   | 0.25 | ND   | ND   | ND   | 0.05 | ND   | ND   | ND   | ND   | 0.10 | 0.06 | 0.02 | 0.02 | 0.06 | ND   | 0.22 | 0.06 | 0.07 | 0.06 | 0.01 | 0.02 | ND   | ND   | 0.03 |  |
| South at 500mt                                                                                                                | 1.03 | 0.98 | 0.15 | 1.05 | 1.10 | 0.24 | 0.98 | 1.94 | 1.53 | 1.87 | 1.13 | 2.33 | 0.17 | 0.97 | 2.84 | 0.11 | 0.09 | 0.60 | 0.43 | 1.49 | 0.38 | 0.93 | 0.10 | 0.96 | 0.19 | 0.17 | 0.47 | 0.24 | 0.18 | 0.13 | 0.11 | 0.11 |  |
| South at 1000mt                                                                                                               | 0.72 | 0.16 | 0.11 | 0.72 | 0.77 | 0.18 | 0.68 | 1.35 | 1.07 | 1.09 | 0.67 | 1.32 | 0.12 | 0.56 | 1.60 | 0.06 | 0.63 | 0.03 | 0.30 | 1.02 | 0.22 | 0.01 | 0.06 | 0.68 | 0.05 | 0.13 | 0.29 | 0.17 | 0.10 | 0.06 | 0.08 | 0.27 |  |
| South at 1500mt                                                                                                               | 0.19 | 0.14 | 0.02 | 0.05 | 0.29 | 0.14 | ND   | 0.11 | 0.53 | ND   | 0.21 | 0.35 | 0.08 | 0.13 | 0.03 | 0.02 | 0.22 | 0.31 | 0.09 | 0.19 | 0.11 | 0.16 | 0.06 | 0.37 | ND   | 0.02 | 0.16 | ND   | 0.10 | 0.01 | ND   | 0.03 |  |
| February                                                                                                                      |      |      |      |      |      |      |      |      |      |      |      |      |      |      |      |      |      |      |      |      |      |      |      |      |      |      |      |      |      |      |      |      |  |
| River Mouth                                                                                                                   | 1.71 | 0.55 | 0.42 | 0.97 | 0.28 | 0.41 | 1.82 | 0.66 | 3.24 | 4.03 | 2.51 | 8.04 | 0.34 | 0.68 | 1.33 | 0.30 | 0.51 | 0.03 | 1.01 | 0.97 | 1.54 | ND   | 0.40 | 0.96 | 0.05 | 0.16 | 0.02 | 0.24 | 0.35 | 0.26 | 1.05 | 0.27 |  |
| Nord at 500mt                                                                                                                 | 0.87 | 0.78 | 0.13 | 0.88 | 0.93 | 0.21 | 0.83 | 1.64 | 1.30 | 1.50 | 0.91 | 1.85 | 0.15 | 0.77 | 2.25 | 0.08 | 1.10 | 0.51 | 0.36 | 1.25 | 0.30 | 0.77 | 0.08 | 0.81 | 0.82 | 0.14 | 0.38 | 0.20 | 0.16 | 0.10 | 0.08 | 0.09 |  |
| Nord at 1000mt                                                                                                                | 0.39 | 0.18 | 0.02 | 0.42 | 0.52 | 0.13 | 0.39 | 0.11 | 0.69 | 0.24 | 0.18 | 0.82 | 0.08 | 0.23 | 0.46 | 0.02 | 0.23 | 0.33 | 0.12 | 0.38 | 0.21 | 0.36 | 0.06 | 0.48 | 0.25 | 0.13 | 0.20 | 0.02 | 0.10 | 0.03 | 0.24 | 0.08 |  |
| Nord at 1500mt                                                                                                                | 0.39 | 0.11 | 0.01 | 0.15 | 0.21 | 0.10 | 0.27 | 0.14 | 0.30 | ND   | 0.03 | 0.49 | 0.06 | 0.06 | ND   | 0.01 | ND   | 0.23 | ND   | 0.14 | 0.05 | 0.10 | ND   | 0.24 | 0.10 | 0.08 | 0.09 | 0.02 | 0.08 | 0.01 | 0.28 | 0.03 |  |
| Central at 500mt                                                                                                              | 0.54 | 0.29 | 0.02 | 0.21 | 0.27 | 0.11 | 0.37 | 0.18 | 0.41 | 0.16 | 0.19 | 1.04 | 0.08 | 0.22 | 0.20 | 0.03 | 0.28 | 0.30 | 0.13 | 0.21 | 0.11 | 0.16 | ND   | 0.31 | 0.18 | 0.09 | 0.16 | 0.02 | 0.10 | 0.03 | 0.41 | 0.04 |  |
| Central at 1000mt                                                                                                             | 0.16 | 0.06 | ND   | 0.15 | 0.21 | 0.10 | 0.26 | ND   | 0.29 | ND   | ND   | ND   | 0.03 | ND   | ND   | ND   | 0.24 | 0.22 | 0.10 | 0.13 | 0.03 | 0.08 | ND   | 0.24 | 0.08 | 0.08 | 0.08 | 0.02 | 0.08 | 0.01 | ND   | 0.03 |  |
| Central at 1500mt                                                                                                             | ND   | 0.19 | ND   | 0.24 | ND   | 0.54 | ND   | 0.22 | ND   | ND   | ND   | 0.33 | ND   | ND   | ND   | ND   | 0.01 | ND   | ND   | 0.10 | ND   | 0.02 | 0.10 | ND   | ND   | 0.05 |  |
| South at 500mt                                                                                                                | 1.02 | 1.30 | 0.04 | 1.06 | 1.19 | 0.25 | 1.07 | 0.27 | 2.10 | 2.29 | 1.47 | 3.51 | 0.24 | 1.24 | 3.93 | 0.14 | 0.33 | 0.80 | 0.19 | 1.16 | 0.98 | 1.38 | 0.16 | 1.20 | 0.91 | 0.19 | 0.78 | 0.04 | 0.22 | 0.26 | 0.77 | 0.19 |  |
| South at 1000mt                                                                                                               | 0.52 | 0.42 | 0.02 | 0.51 | 0.61 | 0.15 | 0.58 | 0.15 | 1.04 | 0.62 | 0.42 | 0.84 | 0.11 | 0.43 | 0.84 | 0.05 | 0.25 | 0.42 | 0.13 | 0.49 | 0.19 | 0.60 | 0.07 | 0.68 | 0.41 | 0.12 | 0.31 | 0.03 | 0.12 | 0.07 | 0.27 | 0.07 |  |
| South at 1500mt                                                                                                               | 0.42 | 0.21 | ND   | 0.41 | 0.45 | 0.14 | 0.42 | 0.11 | 0.75 | 0.28 | 0.26 | 0.47 | 0.09 | 0.19 | 0.57 | 0.03 | ND   | 0.32 | 0.09 | 0.37 | 0.15 | 0.42 | 0.05 | 0.46 | 0.27 | 0.10 | 0.18 | 0.02 | 0.10 | 0.03 | 0.12 | 0.05 |  |
| April                                                                                                                         |      |      |      |      |      |      |      |      |      |      |      |      |      |      |      |      |      |      |      |      |      |      |      |      |      |      |      |      |      |      |      |      |  |
| River Mouth                                                                                                                   | 0.62 | 0.59 | 0.02 | 0.54 | 0.72 | 0.18 | 0.56 | 0.14 | 0.96 | 0.80 | 0.97 | 0.27 | 0.12 | 0.43 | 0.04 | 0.07 | 0.89 | 0.44 | 0.75 | 0.80 | 0.43 | 0.55 | 0.33 | 0.74 | 0.55 | 0.18 | 0.10 | 0.15 | 0.22 | 0.08 | 0.55 | 0.20 |  |
| Nord at 500mt                                                                                                                 | ND   | 0.24 | ND   | 0.25 | 0.11 | 0.12 | ND   | 0.12 | ND   | ND   | ND   | ND   | 0.09 | 0.17 | ND   | 0.03 | 0.22 | 0.14 | 0.09 | ND   | 0.17 | ND   | 0.01 | ND   | 0.05 | 0.08 | ND   | 0.02 | ND   | 0.04 | 0.02 | 0.15 |  |
| Nord at 1000mt                                                                                                                | ND   | 0.18 | ND   | ND   | ND   | 0.12 | ND   | 0.11 | ND   | ND   | ND   | ND   | 0.09 | 0.22 | ND   | 0.02 | 0.02 | 0.32 | 0.08 | ND   | 0.15 | ND   | 0.01 | ND   | ND   | 0.10 | ND   | 0.02 | ND   | 0.06 | ND   | 0.06 |  |
| Nord at 1500mt                                                                                                                | 0.11 | 0.06 | ND   | ND   | ND   | 0.10 | ND   | 0.14 | ND   | ND   | ND   | ND   | 0.06 | ND   | ND   | ND   | ND   | 0.12 | ND   | 0.13 | 0.03 | 0.08 | ND   | 0.04 | 0.08 | 0.08 | 0.07 | ND   | 0.04 | 0.01 | ND   | 0.03 |  |
| Central at 500mt                                                                                                              | 0.40 | 0.02 | 0.06 | 0.38 | 0.44 | 0.13 | 0.37 | 0.72 | 0.62 | 0.13 | 0.10 | ND   | ND   | ND   | 0.04 | ND   | ND   | 0.28 | 0.18 | 0.02 | 0.02 | 0.17 | 0.02 | ND   | 0.13 | ND   | ND   | 0.02 | ND   | ND   | ND   | ND   |  |
| Central at 1000mt                                                                                                             | 0.24 | 0.17 | ND   | 0.17 | 0.23 | 0.10 | 0.30 | 0.09 | 0.33 | 0.01 | 0.08 | 0.08 | 0.07 | 0.04 | ND   | ND   | 0.10 | 0.05 | ND   | 0.16 | 0.07 | 0.02 | ND   | 0.26 | 0.32 | ND   | 0.02 | 0.04 | ND   | ND   | 0.01 | ND   |  |
| Central at 1500mt                                                                                                             | ND   | 0.01 | ND   | 0.17 | 0.23 | 0.10 | 0.31 | 0.09 | 0.33 | 0.02 | 0.09 | 0.10 | 0.07 | 0.05 | ND   | ND   | ND   | 0.25 | ND   | 0.16 | 0.07 | 0.12 | ND   | 0.27 | 0.13 | ND   | 0.12 | 0.02 | 0.51 | ND   | ND   | ND   |  |
| South at 500mt                                                                                                                | 0.39 | 0.17 | 0.08 | 0.05 | 0.52 | 0.14 | 0.38 | 0.11 | 0.65 | 0.32 | 0.08 | 0.75 | 0.09 | 0.21 | 0.31 | 0.01 | 0.64 | 0.31 | 0.49 | 0.34 | 0.19 | 0.08 | 0.12 | 0.02 | 0.08 | 0.10 | 0.02 | 0.09 | 0.10 | 0.03 | 0.11 | 0.01 |  |
| South at 1000mt                                                                                                               | ND   | 0.27 | ND   | 0.26 | 0.32 | 0.12 | 0.06 | 0.12 | 0.10 | 0.45 | 0.38 | ND   | ND   | ND   | 0.09 | 0.03 | 0.22 | 0.35 | 0.09 | 0.18 | 0.19 | 0.24 | 0.01 | ND   | 0.26 | 0.10 | 0.14 | 0.02 | 0.10 | 0.04 | ND   | ND   |  |
| South at 1500mt                                                                                                               | ND   | 0.07 | ND   | 0.19 | 0.24 | 0.10 | 0.33 | ND   | 0.36 | 0.11 | 0.15 | 0.23 | 0.07 | 0.10 | 0.11 | 0.01 | ND   | 0.27 | ND   | 0.18 | 0.09 | 0.14 | ND   | ND   | 0.15 | 0.08 | 0.14 | ND   | 0.09 | 0.04 | 0.95 | 0.05 |  |
| July                                                                                                                          |      |      |      |      |      |      |      |      |      |      |      |      |      |      |      |      |      |      |      |      |      |      |      |      |      |      |      |      |      |      |      |      |  |
| River Mouth                                                                                                                   | 0.11 | 0.48 | 0.17 | 0.62 | 0.51 | 0.04 | 0.37 | 0.13 | 0.08 | 0.31 | 0.51 | 0.07 | 0.08 | 0.22 | 0.18 | 0.10 | 0.16 | 0.30 | 0.52 | 0.58 | 0.29 | 0.35 | 0.19 | 0.63 | 0.36 | 0.13 | 0.73 | 0.16 | 0.14 | 0.07 | 0.33 | 0.29 |  |
| Nord at 500mt                                                                                                                 | ND   | 0.05 | ND   | 0.18 | ND   | 0.10 | 0.32 | ND   | 0.35 | ND   | 0.13 | 0.18 | 0.07 | 0.08 | 0.06 | 0.01 | ND   | 0.26 | ND   | 0.18 | 0.09 | 0.13 | ND   | 0.27 | 0.04 | 0.08 | 0.13 | ND   | 0.08 | 0.02 | ND   | 0.05 |  |
| Nord at 1000mt                                                                                                                | ND   | 0.14 | 0.02 | 0.17 | ND   | 0.10 | 0.09 | 0.06 | 0.02 | ND   | 0.06 | 0.02 | 0.07 | 0.02 | ND   | ND   | 0.05 | 0.04 | ND   | ND   | 0.04 | 0.11 | ND   | ND   | 0.01 | 0.16 | ND   | ND   | ND   | ND   | ND   | ND   |  |
| Nord at 1500mt                                                                                                                | ND   | 0.20 | ND   | 0.08 | ND   | ND   | ND   | ND   | ND   | 0.06 | ND   |  |
| Central at 500mt                                                                                                              | ND   | 0.31 | ND   | 0.29 | 0.05 | 0.13 | ND   | ND   | 0.05 | 0.52 | 0.43 | 0.85 | 0.10 | 0.34 | 0.80 | 0.04 | ND   | 0.32 | ND   | 0.30 | 0.21 | 0.06 | 0.02 | 0.09 | 0.01 | 0.01 | 0.07 | ND   | 0.02 | 0.05 | 0.01 | ND   |  |
| Central at 1000mt                                                                                                             | ND   | ND   | ND   | 0.05 | ND   | 0.07 | 0.05 | ND   | 0.08 | ND   | ND   | 0.89 | 0.10 | ND   | 0.85 | ND   | ND   | 0.09 | ND   | 0.10 | ND   | ND   | 0.02 | ND   | ND   | 0.09 | ND   | ND   | 0.04 | 0.05 | 0.01 | 0.06 |  |
| Central at 1500mt                                                                                                             | ND   | 0.12 | 0.02 | 0.16 | 0.0  |      |      |      |      |      |      |      |      |      |      |      |      |      |      |      |      |      |      |      |      |      |      |      |      |      |      |      |  |



Table S10. Description of concentration of PCBs in Sediment (SED) samples from Sele River. (Southern Italy)

|                   | 8    | 28   | 37   | 44   | 49   | 52   | 60   | 66   | 70   | 74   | 77   | 82   | 87   | 99   | 101  | 105  | 114  | 118  | 126  | 128  | 138  | 153  | 156  | 158  | 166  | 169  | 170  | 179  | 180  | 183  | 187  | 189  |
|-------------------|------|------|------|------|------|------|------|------|------|------|------|------|------|------|------|------|------|------|------|------|------|------|------|------|------|------|------|------|------|------|------|------|
| <b>April</b>      |      |      |      |      |      |      |      |      |      |      |      |      |      |      |      |      |      |      |      |      |      |      |      |      |      |      |      |      |      |      |      |      |
| River Mouth       | 1.66 | 1.54 | 0.11 | 2.31 | 2.45 | 0.26 | 0.74 | 2.95 | 1.34 | 1.24 | 1.59 | 0.26 | 0.25 | 2.33 | 8.70 | 0.45 | 2.25 | 3.43 | 2.27 | 2.53 | 1.66 | 3.32 | 0.12 | 2.25 | 6.92 | 3.75 | 1.05 | 7.28 | 1.54 | 4.70 | 3.48 | 4.65 |
| Nord at 500mt     | 0.08 | 0.14 | 0.03 | 1.55 | 0.17 | 0.36 | 0.25 | 2.91 | 3.77 | 0.24 | 0.16 | 0.95 | 0.31 | 3.86 | 0.55 | 0.04 | 2.74 | 2.82 | 0.19 | 1.59 | 1.39 | 0.10 | 0.26 | 2.41 | 1.03 | 0.01 | 0.11 | 0.30 | 0.01 | 5.01 | 8.61 | 9.25 |
| Nord at 1000mt    | 0.54 | 0.49 | 0.04 | 0.75 | 0.79 | 0.08 | 0.24 | 0.96 | 0.43 | 0.39 | 0.51 | 0.07 | 0.08 | 0.75 | 2.79 | 0.15 | 0.73 | 1.11 | 0.74 | 0.82 | 0.54 | 1.07 | 0.04 | 0.73 | 0.94 | 1.21 | 0.44 | 0.08 | 1.18 | 2.91 | 8.48 | 4.18 |
| Nord at 1500mt    | 0.23 | 0.49 | 0.01 | 0.23 | 0.29 | 0.05 | 0.24 | 0.01 | 0.41 | 0.70 | 0.64 | 1.04 | 0.04 | 0.38 | 1.07 | 0.06 | 0.31 | 0.15 | 0.30 | 0.32 | 0.26 | 0.28 | 0.14 | 0.28 | 0.31 | 0.05 | 0.40 | 0.06 | 0.07 | 0.05 | 1.25 | 9.19 |
| Central at 500mt  | 0.05 | 0.09 | 0.02 | 0.98 | 0.11 | 0.23 | 0.16 | 1.84 | 2.39 | 0.14 | 0.10 | 0.59 | 0.20 | 2.44 | 2.34 | 0.03 | 1.73 | 1.79 | 0.12 | 1.01 | 0.88 | 0.06 | 0.17 | 1.52 | 0.65 | 0.01 | 0.07 | 0.19 | 0.01 | 0.01 | 7.39 | 9.16 |
| Central at 1000mt | 0.02 | 0.04 | 0.05 | 0.47 | 0.05 | 0.61 | 0.07 | 0.48 | 0.62 | 0.03 | 0.04 | 0.05 | 0.53 | 0.73 | 0.01 | 0.07 | 0.60 | 1.32 | 0.05 | 0.46 | 0.61 | 0.02 | 0.47 | 0.70 | 0.31 | 0.03 | 0.05 | 0.72 | 0.02 | 0.02 | 0.47 | 2.59 |
| Central at 1500mt | 0.01 | 0.01 | 0.02 | 0.20 | 0.02 | 0.26 | 0.03 | 0.21 | 0.27 | ND   | 0.01 | ND   | 0.23 | 0.31 | ND   | 0.03 | 0.26 | 0.57 | 0.02 | 0.20 | 0.26 | 0.01 | 0.20 | 0.30 | 0.13 | 0.01 | 0.02 | 0.11 | 0.01 | 0.01 | 0.20 | 1.16 |
| South at 500mt    | 0.13 | 0.26 | 0.04 | 2.71 | 0.30 | 0.63 | 0.43 | 5.08 | 6.60 | 0.43 | 0.29 | 1.69 | 0.54 | 6.76 | 0.99 | 0.08 | 4.79 | 4.93 | 0.33 | 2.78 | 2.43 | 0.17 | 0.46 | 4.21 | 1.80 | 0.02 | 0.20 | 0.53 | 1.03 | 1.02 | 1.17 | 9.24 |
| South at 1000mt   | 0.08 | 0.16 | 0.03 | 1.66 | 0.18 | 0.38 | 0.26 | 3.10 | 4.03 | 0.26 | 0.17 | 1.02 | 0.33 | 4.12 | 0.59 | 0.05 | 2.92 | 3.01 | 0.20 | 1.70 | 1.48 | 0.10 | 0.28 | 2.02 | 1.10 | 0.01 | 0.13 | 0.33 | 0.02 | 0.02 | 0.65 | 5.08 |
| South at 1500mt   | 0.63 | 0.23 | 0.04 | 0.18 | 0.23 | 0.10 | 0.28 | 0.12 | 0.11 | 0.46 | 0.60 | 0.05 | 0.10 | 0.88 | 0.29 | 0.17 | 0.86 | 0.31 | 0.26 | 0.96 | 0.63 | 0.16 | 0.05 | 0.76 | 0.11 | 0.12 | 0.20 | 0.09 | 0.21 | 0.41 | 0.16 | 0.39 |

ND: No Detectable

Table S11. Description of concentration of OCPs in water dissolved phase (DP) samples from Sele River. (Southern Italy)

|                   | Lindane | a-HCH | b-HCH | d- HCH | Heptachloro | Aldrin | H.eoposido | a-endos. | b-endos. | E. Sulfate | DDE  | DDD  | DDT  | Metox | Dieldrin | Endrin |
|-------------------|---------|-------|-------|--------|-------------|--------|------------|----------|----------|------------|------|------|------|-------|----------|--------|
| <b>November</b>   |         |       |       |        |             |        |            |          |          |            |      |      |      |       |          |        |
| River Mouth       | 0.36    | 0.09  | 0.29  | 0.06   | 0.06        | 0.01   | 0.34       | 0.79     | 0.21     | 0.32       | 0.27 | 0.26 | 0.05 | 0.10  | 0.45     | 0.11   |
| Nord at 500mt     | 0.30    | 0.06  | 0.30  | 0.01   | 0.02        | 0.06   | 0.22       | 0.15     | 0.07     | 0.25       | 0.14 | 0.11 | 0.02 | 0.03  | 0.34     | 0.02   |
| Nord at 1000mt    | 0.29    | 0.06  | 0.29  | 0.01   | 0.02        | 0.04   | 0.19       | 0.13     | 0.06     | 0.14       | 0.14 | 0.11 | 0.04 | 0.03  | 0.22     | 0.02   |
| Nord at 1500mt    | ND      | ND    | 0.28  | 0.01   | 0.01        | ND     | 0.07       | 0.04     | 0.06     | 0.24       | ND   | 0.09 | ND   | 0.02  | ND       | 0.08   |
| Central at 500mt  | ND      | ND    | 0.35  | 0.04   | 0.05        | ND     | 0.21       | 0.14     | 0.07     | 0.34       | 0.21 | 0.11 | 0.01 | 0.05  | 0.40     | 0.01   |
| Central at 1000mt | ND      | ND    | 0.35  | 0.04   | 0.05        | ND     | 0.19       | 0.06     | 0.13     | 0.25       | ND   | 0.10 | ND   | 0.02  | ND       | 0.01   |
| Central at 1500mt | ND      | ND    | 0.32  | ND     | ND          | ND     | 0.17       | 0.10     | ND       | 0.23       | ND   | ND   | ND   | ND    | ND       | ND     |
| South at 500mt    | 0.38    | 0.06  | 0.30  | 0.04   | 0.06        | ND     | 0.21       | 0.14     | 0.07     | 0.26       | 0.15 | 0.11 | 0.06 | 0.04  | 0.15     | 0.14   |
| South at 1000mt   | ND      | 0.06  | 0.33  | ND     | ND          | ND     | 0.19       | 1.03     | ND       | ND         | ND   | ND   | ND   | ND    | ND       | ND     |
| South at 1500mt   | ND      | 0.06  | 0.27  | 0.01   | ND          | ND     | 0.07       | 0.04     | ND       | ND         | ND   | 0.29 | ND   | ND    | ND       | ND     |
| <b>February</b>   |         |       |       |        |             |        |            |          |          |            |      |      |      |       |          |        |
| River Mouth       | 0.35    | 0.06  | 0.28  | 0.01   | 0.02        | ND     | 0.08       | 0.18     | 0.07     | 0.23       | 0.16 | 0.11 | 0.06 | 0.03  | 0.30     | 0.02   |
| Nord at 500mt     | 0.29    | ND    | 0.29  | 0.01   | 0.01        | 0.06   | 0.19       | 0.10     | 0.07     | ND         | 0.04 | 0.02 | 0.01 | 0.03  | ND       | ND     |
| Nord at 1000mt    | ND      | 0.09  | ND    | 0.01   | 0.01        | ND     | 0.18       | 0.04     | 0.07     | 0.05       | 0.10 | 0.11 | ND   | 0.08  | ND       | 0.01   |
| Nord at 1500mt    | ND      | 0.06  | ND    | ND     | 0.05        | ND     | 0.18       | 0.10     | ND       | ND         | 0.21 | 0.09 | ND   | 0.02  | ND       | 0.01   |
| Central at 500mt  | ND      | 0.06  | ND    | ND     | 0.06        | 0.07   | 0.19       | 0.09     | ND       | ND         | 0.10 | 0.21 | 0.01 | ND    | ND       | 0.01   |
| Central at 1000mt | ND      | 0.06  | ND    | ND     | 0.02        | ND     | 0.09       | 0.04     | ND       | ND         | 0.06 | 0.10 | 0.01 | 0.09  | ND       | 0.01   |
| Central at 1500mt | ND      | ND    | ND    | ND     | 0.02        | ND     | 0.17       | 0.09     | ND       | ND         | 0.04 | ND   | 0.01 | ND    | ND       | 0.02   |
| South at 500mt    | 0.38    | 0.12  | 0.30  | 0.10   | 0.02        | 0.01   | 0.09       | 0.14     | 0.24     | ND         | 0.28 | ND   | 0.05 | 0.03  | ND       | 0.07   |
| South at 1000mt   | 0.36    | ND    | ND    | ND     | 0.01        | ND     | 0.31       | 0.12     | ND       | ND         | 0.21 | 0.03 | 0.06 | ND    | ND       | ND     |
| South at 1500mt   | 0.34    | ND    | ND    | ND     | 0.01        | ND     | 0.08       | 0.12     | ND       | ND         | 0.14 | 0.10 | 0.01 | ND    | ND       | ND     |
| <b>April</b>      |         |       |       |        |             |        |            |          |          |            |      |      |      |       |          |        |
| River Mouth       | 0.55    | 0.09  | 0.32  | 0.04   | 0.09        | 0.51   | 0.39       | 0.58     | 0.11     | 0.26       | 0.13 | 0.10 | 0.38 | 0.08  | 0.37     | 0.07   |
| Nord at 500mt     | ND      | ND    | 0.31  | 0.01   | 0.01        | ND     | 0.19       | 0.10     | 0.07     | 0.26       | 0.11 | 0.10 | 0.01 | ND    | 0.31     | 0.21   |
| Nord at 1000mt    | ND      | ND    | 0.29  | ND     | 0.01        | ND     | 0.07       | 0.05     | 0.06     | 0.24       | 0.15 | 0.05 | 0.09 | ND    | ND       | ND     |
| Nord at 1500mt    | ND      | 0.06  | 0.32  | ND     | ND          | ND     | 0.13       | 0.10     | ND       | ND         | ND   | ND   | ND   | 0.24  | ND       | ND     |
| Central at 500mt  | ND      | 0.06  | 0.28  | 0.01   | ND          | ND     | 0.07       | 0.04     | 0.06     | 0.23       | 0.14 | 0.02 | ND   | ND    | 1.14     | ND     |
| Central at 1000mt | ND      | ND    | 0.28  | 0.01   | ND          | ND     | 0.06       | 0.04     | 0.06     | 0.23       | 0.23 | 0.07 | ND   | ND    | ND       | ND     |
| Central at 1500mt | ND      | ND    | 0.27  | 0.01   | ND          | ND     | ND         | 0.04     | ND       | 0.22       | ND   | 0.07 | ND   | ND    | ND       | 0.23   |
| South at 500mt    | 0.28    | 0.05  | 0.27  | 0.01   | 0.01        | 0.06   | 0.06       | 0.05     | 0.07     | 1.03       | 0.16 | 0.08 | ND   | 1.01  | 0.11     | ND     |
| South at 1000mt   | ND      | 0.05  | 0.29  | ND     | ND          | 0.06   | 0.07       | 0.04     | 0.06     | 0.23       | 0.13 | 0.08 | 1.00 | 0.11  | ND       | ND     |
| South at 1500mt   | ND      | 0.05  | 0.17  | ND     | ND          | ND     | 0.07       | 0.03     | 0.05     | 0.02       | ND   | 0.04 | ND   | 1.01  | ND       | ND     |
| <b>July</b>       |         |       |       |        |             |        |            |          |          |            |      |      |      |       |          |        |
| River Mouth       | 0.47    | 0.14  | 0.29  | 0.09   | 0.17        | 0.13   | 0.66       | 1.07     | 0.36     | 0.46       | 0.31 | 0.51 | 0.14 | 0.22  | 0.52     | 0.18   |
| Nord at 500mt     | 0.30    | 0.06  | 0.29  | 0.01   | 0.05        | ND     | 0.07       | 0.10     | 0.13     | 0.24       | 0.28 | 0.10 | 0.01 | 0.02  | 1.32     | 0.01   |
| Nord at 1000mt    | ND      | ND    | 0.27  | 0.01   | 0.02        | ND     | ND         | 0.04     | 0.06     | ND         | 0.26 | 0.07 | 0.01 | 0.02  | 0.31     | 1.02   |
| Nord at 1500mt    | ND      | ND    | 0.18  | 0.01   | 0.01        | ND     | ND         | ND       | 0.02     | ND         | 0.01 | 0.02 | ND   | 0.01  | 1.03     | ND     |
| Central at 500mt  | 0.28    | 0.05  | 0.27  | ND     | 0.01        | 0.01   | 0.05       | 0.04     | 0.06     | 0.12       | 0.05 | 0.01 | ND   | 0.01  | 0.01     | 1.00   |
| Central at 1000mt | 0.28    | ND    | 0.27  | 0.01   | 0.01        | ND     | ND         | ND       | 0.06     | ND         | 0.10 | 0.06 | ND   | 0.01  | 0.51     | ND     |
| Central at 1500mt | ND      | ND    | 0.27  | 0.01   | 0.01        | ND     | ND         | 0.04     | 0.05     | ND         | 0.14 | 0.05 | ND   | 0.01  | 0.31     | 0.01   |
| South at 500mt    | 0.28    | 0.11  | 0.27  | 0.01   | 0.02        | 0.18   | 0.06       | 0.20     | 0.07     | 0.41       | 1.27 | 0.09 | 0.01 | 0.01  | 0.30     | 1.10   |
| South at 1000mt   | 0.29    | 0.10  | 0.27  | 0.01   | 0.01        | 0.05   | 0.07       | 0.13     | 0.06     | 0.35       | 0.19 | 0.08 | 0.01 | 0.82  | 0.32     | 0.10   |
| South at 1500mt   | ND      | 0.06  | 0.30  | 0.01   | ND          | ND     | ND         | 0.05     | 0.07     | ND         | 0.16 | 0.10 | 0.01 | 0.75  | 0.36     | ND     |

ND: No Detectable

Table S12. Description of concentration of OCPs in Suspended Particulate Matter (SPM) samples from Sele River. (Southern Italy)

|                   | Lindane | a-HCH | b-HCH | d- HCH | Heptachloro | Aldrin | H.eopossido | a-endos. | b-endos. | E. Sulfate | DDE  | DDD  | DDT  | Metox | Dieldrin | Endrin |
|-------------------|---------|-------|-------|--------|-------------|--------|-------------|----------|----------|------------|------|------|------|-------|----------|--------|
| <b>November</b>   |         |       |       |        |             |        |             |          |          |            |      |      |      |       |          |        |
| River Mouth       | 0.35    | 0.09  | 0.08  | 0.05   | 0.06        | ND     | 0.03        | 0.75     | 0.19     | 0.07       | 0.27 | 0.43 | 0.11 | 0.27  | 0.43     | 0.80   |
| Nord at 500mt     | 0.09    | 0.06  | 0.28  | 0.01   | ND          | ND     | 0.07        | 0.04     | ND       | 0.23       | 0.03 | 0.08 | ND   | 0.01  | 0.30     | 0.02   |
| Nord at 1000mt    | ND      | 0.05  | 0.27  | 0.01   | ND          | ND     | ND          | 0.04     | ND       | 0.22       | ND   | 0.06 | ND   | ND    | 0.31     | ND     |
| Nord at 1500mt    | ND      | ND    | 0.27  | 0.01   | ND          | ND     | 0.05        | 0.04     | 0.05     | 0.23       | ND   | 0.07 | ND   | 0.12  | ND       | ND     |
| Central at 500mt  | ND      | ND    | 0.28  | 0.01   | 0.01        | ND     | ND          | 0.24     | 0.16     | 0.24       | 0.23 | 0.07 | ND   | 0.01  | ND       | 0.01   |
| Central at 1000mt | ND      | ND    | 0.27  | ND     | ND          | ND     | 0.15        | ND       | 0.16     | ND         | ND   | 0.07 | ND   | ND    | 0.33     | ND     |
| Central at 1500mt | ND      | ND    | 0.29  | ND     | ND          | 0.16   | 0.06        | 0.04     | 0.06     | ND         | ND   | 0.15 | ND   | ND    | 0.16     | ND     |
| South at 500mt    | 0.31    | 0.06  | 0.29  | 0.01   | 0.01        | ND     | 0.07        | 0.05     | 0.06     | 0.24       | 0.14 | 0.08 | 0.01 | 0.01  | 0.13     | 0.07   |
| South at 1000mt   | ND      | 0.06  | 0.28  | 0.01   | 0.21        | ND     | 0.07        | 0.04     | 0.06     | 0.23       | ND   | ND   | ND   | ND    | 0.30     | ND     |
| South at 1500mt   | ND      | 0.05  | 0.27  | 0.01   | ND          | ND     | 0.07        | 0.04     | 0.05     | ND         | ND   | 0.07 | ND   | 0.01  | 0.16     | ND     |
| <b>February</b>   |         |       |       |        |             |        |             |          |          |            |      |      |      |       |          |        |
| River Mouth       | 0.38    | 0.09  | 0.44  | 0.06   | 0.06        | 0.29   | 0.43        | 0.77     | 0.20     | 0.41       | 0.26 | 0.41 | 0.10 | 0.32  | 0.41     | 0.20   |
| Nord at 500mt     | 0.31    | ND    | 0.29  | 0.01   | 0.01        | 0.06   | 0.07        | 0.10     | 0.07     | 0.25       | 0.15 | 0.11 | 0.01 | 0.02  | 0.33     | 0.01   |
| Nord at 1000mt    | ND      | 0.09  | ND    | 0.01   | 0.01        | ND     | 0.19        | 0.05     | 0.07     | 0.24       | 0.14 | 0.10 | ND   | 0.08  | ND       | 0.05   |
| Nord at 1500mt    | ND      | 0.06  | ND    | ND     | 0.01        | ND     | 0.20        | 0.04     | 0.15     | ND         | 0.14 | 0.10 | ND   | 0.05  | 0.15     | 0.11   |
| Central at 500mt  | ND      | 0.06  | ND    | ND     | 0.03        | 0.05   | 0.22        | 0.04     | ND       | 0.12       | 0.15 | 0.10 | 0.21 | 0.22  | 0.26     | 0.41   |
| Central at 1000mt | ND      | 0.06  | ND    | ND     | 0.01        | ND     | 0.09        | 0.05     | ND       | 0.25       | 0.15 | 0.11 | 0.01 | 0.22  | 0.25     | 0.04   |
| Central at 1500mt | ND      | ND    | ND    | ND     | 0.01        | ND     | 0.20        | 0.10     | ND       | 0.18       | 0.15 | ND   | 0.01 | 0.20  | ND       | 0.04   |
| South at 500mt    | 0.37    | 0.12  | 0.28  | 0.07   | 0.01        | 0.01   | 0.08        | 0.12     | 0.19     | 0.23       | 0.16 | 0.09 | 0.06 | 0.05  | 0.31     | 0.04   |
| South at 1000mt   | 0.31    | ND    | ND    | ND     | 0.01        | ND     | 0.20        | 0.11     | ND       | ND         | 0.21 | 0.10 | 0.21 | ND    | 0.14     | ND     |
| South at 1500mt   | 0.34    | ND    | ND    | ND     | 0.01        | ND     | 0.07        | 0.09     | ND       | ND         | 0.17 | ND   | 0.21 | ND    | ND       | ND     |
| <b>April</b>      |         |       |       |        |             |        |             |          |          |            |      |      |      |       |          |        |
| River Mouth       | 0.48    | 0.06  | 0.30  | 0.01   | 0.01        | ND     | 0.08        | 0.05     | 0.07     | 0.26       | 0.15 | 0.11 | 0.01 | 0.02  | 0.45     | 0.01   |
| Nord at 500mt     | ND      | ND    | 0.28  | 0.19   | ND          | ND     | 0.07        | 0.04     | 0.15     | 0.16       | 0.15 | ND   | ND   | 0.02  | ND       | ND     |
| Nord at 1000mt    | ND      | ND    | 0.29  | ND     | ND          | ND     | ND          | 0.04     | ND       | 0.16       | 0.14 | ND   | ND   | 0.11  | 0.25     | ND     |
| Nord at 1500mt    | ND      | 0.05  | 0.28  | ND     | ND          | ND     | 0.09        | 0.09     | ND       | ND         | ND   | ND   | ND   | ND    | ND       | ND     |
| Central at 500mt  | ND      | 0.05  | 0.27  | ND     | ND          | ND     | 0.06        | 0.04     | 0.06     | 0.22       | 0.13 | 0.07 | 0.01 | 0.01  | 0.26     | ND     |
| Central at 1000mt | ND      | ND    | 0.27  | 0.01   | ND          | ND     | 0.06        | 0.04     | ND       | 0.23       | ND   | 0.07 | ND   | ND    | 0.28     | 0.14   |
| Central at 1500mt | ND      | ND    | 0.29  | 0.01   | ND          | ND     | ND          | 0.09     | ND       | ND         | ND   | 0.09 | ND   | ND    | ND       | ND     |
| South at 500mt    | 0.28    | 0.05  | 0.27  | 0.01   | ND          | ND     | 0.05        | 0.04     | 0.06     | 0.12       | 0.13 | 0.07 | 0.06 | 0.01  | 0.21     | 0.10   |
| South at 1000mt   | ND      | 0.06  | 0.29  | ND     | ND          | ND     | 0.07        | 0.04     | 0.06     | 0.24       | 0.15 | 0.08 | 0.01 | 0.24  | ND       | ND     |
| South at 1500mt   | ND      | 0.05  | ND    | ND     | ND          | ND     | 0.07        | 0.04     | 0.05     | 0.23       | 0.13 | ND   | ND   | 0.03  | ND       | ND     |
| <b>July</b>       |         |       |       |        |             |        |             |          |          |            |      |      |      |       |          |        |
| River Mouth       | 0.30    | 0.06  | 0.28  | 0.01   | 0.01        | ND     | 0.08        | 0.05     | 0.07     | 0.23       | 0.05 | 0.11 | 0.01 | 0.03  | 0.26     | 0.01   |
| Nord at 500mt     | 0.29    | ND    | ND    | ND     | ND          | ND     | ND          | ND       | 0.04     | 0.22       | ND   | ND   | ND   | ND    | ND       | ND     |
| Nord at 1000mt    | 0.28    | ND    | ND    | ND     | ND          | ND     | ND          | ND       | 0.05     | 0.12       | ND   | ND   | 0.03 | ND    | ND       | ND     |
| Nord at 1500mt    | 0.29    | ND    | ND    | ND     | ND          | ND     | ND          | ND       | 0.06     | ND         | ND   | ND   | 0.03 | ND    | ND       | ND     |
| Central at 500mt  | ND      | ND    | 0.27  | ND     | 0.01        | 0.01   | ND          | ND       | ND       | ND         | ND   | 0.07 | 0.01 | 0.02  | 0.09     | ND     |
| Central at 1000mt | ND      | ND    | ND    | 0.01   | 0.01        | ND     | ND          | ND       | ND       | ND         | ND   | 0.03 | ND   | 0.01  | 0.13     | 0.13   |
| Central at 1500mt | ND      | ND    | ND    | 0.01   | ND          | ND     | ND          | ND       | ND       | ND         | ND   | 0.04 | ND   | ND    | ND       | ND     |
| South at 500mt    | 0.28    | ND    | ND    | 0.01   | ND          | ND     | ND          | 0.15     | ND       | ND         | 0.08 | 0.09 | 0.08 | ND    | ND       | ND     |
| South at 1000mt   | ND      | ND    | ND    | 0.01   | ND          | ND     | ND          | ND       | ND       | ND         | 0.20 | 0.09 | 0.09 | ND    | ND       | ND     |
| South at 1500mt   | ND      | ND    | ND    | 0.01   | ND          | ND     | ND          | ND       | ND       | ND         | ND   | 0.07 | 0.02 | ND    | ND       | ND     |

ND: No Detectable

Table S13. Description of concentration of OCPs in Sediment (SED) samples from Sele River. (Southern Italy)

|                   | Lindane | a-HCH | b-HCH | d- HCH | Heptachloro | Aldrin | H.epossido | a-endos. | b-endos. | E. Sulfate | DDE  | DDD  | DDT  | Metox | Dieldrin | Endrin |
|-------------------|---------|-------|-------|--------|-------------|--------|------------|----------|----------|------------|------|------|------|-------|----------|--------|
| <b>April</b>      |         |       |       |        |             |        |            |          |          |            |      |      |      |       |          |        |
| River Mouth       | 0.75    | 0.15  | 0.26  | 0.18   | 0.27        | 0.02   | 2.03       | 0.33     | 1.45     | 0.05       | 1.37 | 2.93 | 1.12 | 1.00  | 1.16     | 2.21   |
| Nord at 500mt     | 0.03    | 0.04  | 0.07  | 0.05   | 0.07        | 0.03   | 0.01       | 0.08     | 0.01     | 0.18       | 0.35 | 0.24 | 0.03 | 0.05  | 0.07     | 0.09   |
| Nord at 1000mt    | 0.02    | 0.02  | 0.01  | 0.02   | 0.05        | 0.06   | 0.46       | 0.06     | 0.04     | 0.09       | 0.17 | 0.08 | 0.01 | 0.06  | 0.04     | 0.02   |
| Nord at 1500mt    | 0.02    | 0.01  | 0.01  | 0.01   | 0.02        | 0.03   | 0.60       | 0.03     | 0.02     | 0.30       | 0.02 | 0.05 | 0.01 | 0.03  | 0.03     | 0.01   |
| Central at 500mt  | 0.03    | 0.02  | 0.03  | 0.02   | 0.02        | 0.03   | 0.63       | 0.03     | 0.05     | 0.03       | 0.02 | 0.08 | 0.30 | 0.02  | 0.22     | 0.01   |
| Central at 1000mt | 0.02    | 0.01  | 0.01  | 0.01   | ND          | 0.01   | 0.01       | 0.02     | 0.03     | 0.02       | 0.02 | 0.74 | 0.01 | 0.16  | 0.02     | 0.22   |
| Central at 1500mt | 0.02    | 0.03  | 0.04  | ND     | 0.02        | 0.03   | 0.03       | 0.04     | 0.02     | 0.02       | 0.71 | 0.02 | 0.03 | 0.02  | 0.03     | 0.01   |
| South at 500mt    | 0.03    | 0.04  | 0.07  | 0.05   | 0.07        | 1.03   | 0.51       | 0.08     | 0.11     | 0.38       | 0.35 | 0.24 | 0.03 | 0.45  | 0.17     | 0.24   |
| South at 1000mt   | 0.03    | 0.02  | 0.01  | 0.01   | ND          | 0.01   | 0.01       | 0.02     | 0.03     | 0.03       | 0.12 | 1.26 | 0.01 | 0.41  | 0.61     | 0.27   |
| South at 1500mt   | 0.03    | 0.02  | 0.04  | ND     | 0.02        | 0.04   | 0.06       | 0.12     | 0.12     | 0.04       | 0.05 | 0.01 | 0.02 | 0.03  | 0.20     | 0.21   |

ND: No Detectable
